# Supplementary material for: A facile one step route that introduces functionality to polymer powders for laser sintering
Source: PubMed Central journal article supplement (PMC11009337; doi:10.1038/s41467-024-47376-4), 2024-04-11
Supplement: 41467_2024_47376_MOESM3_ESM.pdf [file 41467_2024_47376_MOESM3_ESM.pdf]

## Reporting Summary

Nature Portfolio wishes to improve the reproducibility of the work that we publish. This form provides structure for consistency and transparency in reporting. For further information on Nature Portfolio policies, see our [Editorial Policies](#) and the [Editorial Policy Checklist](#).

### Statistics

For all statistical analyses, confirm that the following items are present in the figure legend, table legend, main text, or Methods section.

n/a Confirmed

- The exact sample size ( $n$ ) for each experimental group/condition, given as a discrete number and unit of measurement
- A statement on whether measurements were taken from distinct samples or whether the same sample was measured repeatedly
- The statistical test(s) used AND whether they are one- or two-sided  
*Only common tests should be described solely by name; describe more complex techniques in the Methods section.*
- A description of all covariates tested
- A description of any assumptions or corrections, such as tests of normality and adjustment for multiple comparisons
- A full description of the statistical parameters including central tendency (e.g. means) or other basic estimates (e.g. regression coefficient) AND variation (e.g. standard deviation) or associated estimates of uncertainty (e.g. confidence intervals)
- For null hypothesis testing, the test statistic (e.g.  $F$ ,  $t$ ,  $r$ ) with confidence intervals, effect sizes, degrees of freedom and  $P$  value noted  
*Give  $P$  values as exact values whenever suitable.*
- For Bayesian analysis, information on the choice of priors and Markov chain Monte Carlo settings
- For hierarchical and complex designs, identification of the appropriate level for tests and full reporting of outcomes
- Estimates of effect sizes (e.g. Cohen's  $d$ , Pearson's  $r$ ), indicating how they were calculated

*Our web collection on [statistics for biologists](#) contains articles on many of the points above.*

### Software and code

Policy information about [availability of computer code](#)

#### Data collection

For the prediction of the colour of printed parts a combination of Particle Swarm Optimisation (PSO)1-3 and simplex-lattice/centroid designs was used. The prediction model (multivariate cubic regression model) was built based on a 4-factor simplex-lattice design generated by using the TIBCO Statistica® 13.3.0. software. The Statistical evaluation with a significance level ( $p$ ) equal to 0.05 and the parametric data analysis based on the analysis of variance (ANOVA) were also carried out using the TIBCO Statistica® 13.3.0.

The sequential optimisation procedure adopted to determine the colour composition based on PSO technique finds the best candidates for the cubic regression model by minimization of quadratic difference between the desired value of the colour difference and response (output) of the cubic regression model used to evaluate the optimal estimated composition values for the components (colours). The computer codes for the optimisation tasks were written in both Fortran (Intel® Fortran Compiler 19.0 for Windows) and Python (Python 3.10.6 64-bit for macOS) and are available on request and/or from GitHub ([https://github.com/faumachado/colour\\_model](https://github.com/faumachado/colour_model)).

#### Data analysis

For the prediction of the colour of printed parts a combination of Particle Swarm Optimisation (PSO)1-3 and simplex-lattice/centroid designs was used. The prediction model (multivariate cubic regression model) was built based on a 4-factor simplex-lattice design generated by using the TIBCO Statistica® 13.3.0. software. The Statistical evaluation with a significance level ( $p$ ) equal to 0.05 and the parametric data analysis based on the analysis of variance (ANOVA) were also carried out using the TIBCO Statistica® 13.3.0.

The sequential optimisation procedure adopted to determine the colour composition based on PSO technique finds the best candidates for the cubic regression model by minimization of quadratic difference between the desired value of the colour difference and response (output) of the cubic regression model used to evaluate the optimal estimated composition values for the components (colours). The computer codes for the optimisation tasks were written in both Fortran (Intel® Fortran Compiler 19.0 for Windows) and Python (Python 3.10.6 64-bit for macOS).

macOS) and are available on request and/or from GitHub ([https://github.com/faumachado/colour\\_model](https://github.com/faumachado/colour_model)).

For manuscripts utilizing custom algorithms or software that are central to the research but not yet described in published literature, software must be made available to editors and reviewers. We strongly encourage code deposition in a community repository (e.g. GitHub). See the Nature Portfolio [guidelines for submitting code & software](#) for further information.

## Data

Policy information about [availability of data](#)

All manuscripts must include a [data availability statement](#). This statement should provide the following information, where applicable:

- Accession codes, unique identifiers, or web links for publicly available datasets
- A description of any restrictions on data availability
- For clinical datasets or third party data, please ensure that the statement adheres to our [policy](#)

Supporting information: includes materials, synthetic and analysis methods, and further characterisation. The full data is available from the corresponding author upon request.

## Research involving human participants, their data, or biological material

Policy information about studies with [human participants or human data](#). See also policy information about [sex, gender \(identity/presentation\), and sexual orientation](#) and [race, ethnicity and racism](#).

|                                                                    |    |
|--------------------------------------------------------------------|----|
| Reporting on sex and gender                                        | NA |
| Reporting on race, ethnicity, or other socially relevant groupings | NA |
| Population characteristics                                         | NA |
| Recruitment                                                        | NA |
| Ethics oversight                                                   | NA |

Note that full information on the approval of the study protocol must also be provided in the manuscript.

## Field-specific reporting

Please select the one below that is the best fit for your research. If you are not sure, read the appropriate sections before making your selection.

Life sciences       Behavioural & social sciences       Ecological, evolutionary & environmental sciences

For a reference copy of the document with all sections, see [nature.com/documents/nr-reporting-summary-flat.pdf](https://www.nature.com/documents/nr-reporting-summary-flat.pdf)

## Life sciences study design

All studies must disclose on these points even when the disclosure is negative.

|                 |                                                                                                                                                                                                                                                                                                                                                                                                                                                                                                                                                           |
|-----------------|-----------------------------------------------------------------------------------------------------------------------------------------------------------------------------------------------------------------------------------------------------------------------------------------------------------------------------------------------------------------------------------------------------------------------------------------------------------------------------------------------------------------------------------------------------------|
| Sample size     | At least three independent biological replicates were used. This followed our previous work (e.g. <a href="https://www.science.org/doi/full/10.1126/sciadv.aba6574">https://www.science.org/doi/full/10.1126/sciadv.aba6574</a> ) establishing this to be an appropriate sample size for determining statistically significant effects for the assays described.                                                                                                                                                                                          |
| Data exclusions | No data were excluded                                                                                                                                                                                                                                                                                                                                                                                                                                                                                                                                     |
| Replication     | The use of independent biological replicates (see above) was used to assure experimental reproducibility. All experiments were replicated and all attempts at replication are presented. At least three independent biological replicates were used. This followed our previous work (e.g. <a href="https://www.science.org/doi/full/10.1126/sciadv.aba6574">https://www.science.org/doi/full/10.1126/sciadv.aba6574</a> ) establishing this to be an appropriate sample size for determining statistically significant effects for the assays described. |
| Randomization   | Data were collected by test-material, for each test-organism. All biological measurements were continuous rather than discrete. The experiments were grouped by the organisms, which were independent of each other and therefore covariates were irrelevant.                                                                                                                                                                                                                                                                                             |
| Blinding        | Blinding was not used as the researchers needed to determine which samples were the control groups for data analysis and additionally, the control group PA-12 was visibly different to the other samples.                                                                                                                                                                                                                                                                                                                                                |

## Reporting for specific materials, systems and methods

We require information from authors about some types of materials, experimental systems and methods used in many studies. Here, indicate whether each material, system or method listed is relevant to your study. If you are not sure if a list item applies to your research, read the appropriate section before selecting a response.

### Materials & experimental systems

### Methods

- | n/a                                 | Included in the study                                           |
|-------------------------------------|-----------------------------------------------------------------|
| <input checked="" type="checkbox"/> | <input type="checkbox"/> Antibodies                             |
| <input checked="" type="checkbox"/> | <input type="checkbox"/> Eukaryotic cell lines                  |
| <input checked="" type="checkbox"/> | <input type="checkbox"/> Palaeontology and archaeology          |
| <input type="checkbox"/>            | <input checked="" type="checkbox"/> Animals and other organisms |
| <input checked="" type="checkbox"/> | <input type="checkbox"/> Clinical data                          |
| <input checked="" type="checkbox"/> | <input type="checkbox"/> Dual use research of concern           |
| <input checked="" type="checkbox"/> | <input type="checkbox"/> Plants                                 |

- | n/a                                 | Included in the study                           |
|-------------------------------------|-------------------------------------------------|
| <input checked="" type="checkbox"/> | <input type="checkbox"/> ChIP-seq               |
| <input checked="" type="checkbox"/> | <input type="checkbox"/> Flow cytometry         |
| <input checked="" type="checkbox"/> | <input type="checkbox"/> MRI-based neuroimaging |

## Animals and other research organisms

Policy information about [studies involving animals](#); [ARRIVE guidelines](#) recommended for reporting animal research, and [Sex and Gender in Research](#)

|                         |                                                                                    |
|-------------------------|------------------------------------------------------------------------------------|
| Laboratory animals      | <input type="text" value="No laboratory animals were used. Only microorganisms."/> |
| Wild animals            | <input type="text" value="N/A"/>                                                   |
| Reporting on sex        | <input type="text" value="N/A"/>                                                   |
| Field-collected samples | <input type="text" value="N/A"/>                                                   |
| Ethics oversight        | <input type="text" value="N/A"/>                                                   |

Note that full information on the approval of the study protocol must also be provided in the manuscript.
